# Supplementary material
Source: PubMed Central journal article supplement (PMC61120)

Linear scaling, 2% trimmed mean of "P" genes

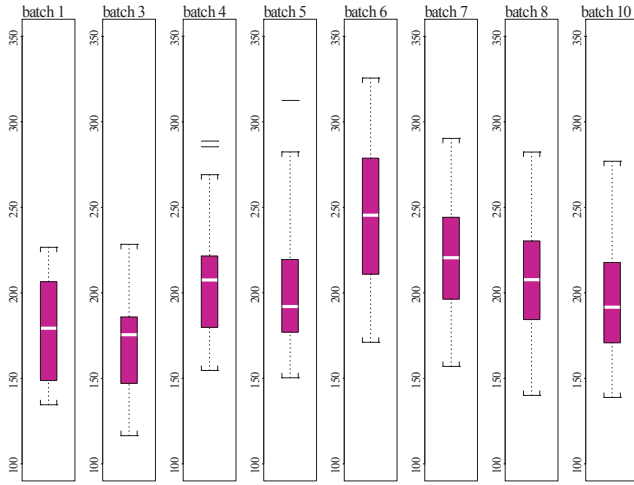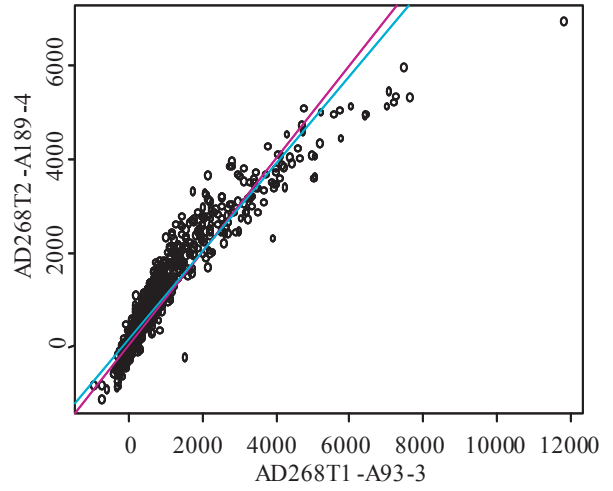

Nonlinear rank invariant scaling, 2% trimmed mean of "P" genes

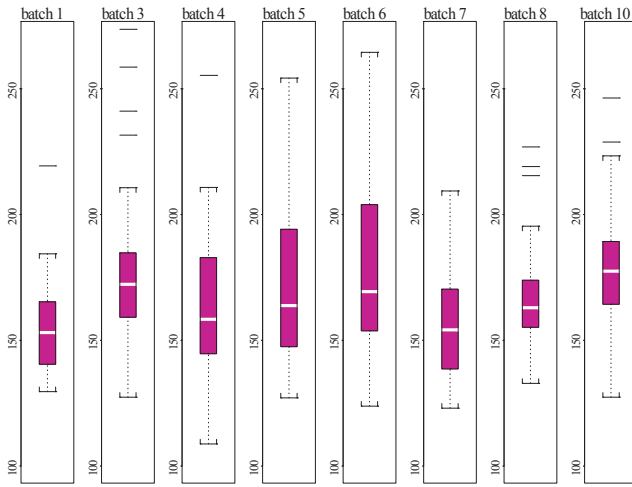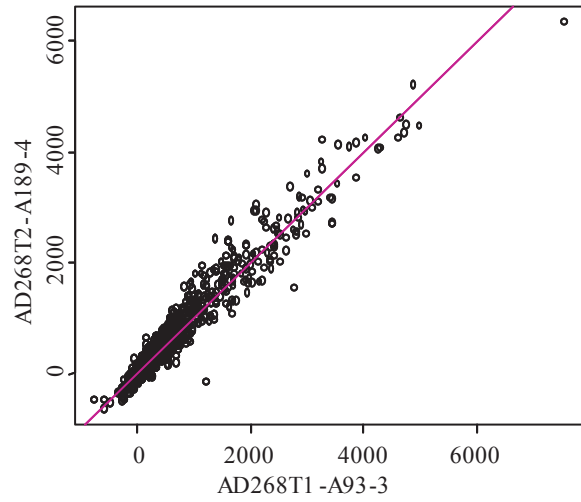

Supplement: pnas_191502998_13.pdf [file pnas_191502998_13.pdf]
