# Supplementary material
Source: PubMed Central journal article supplement (PMC61120)

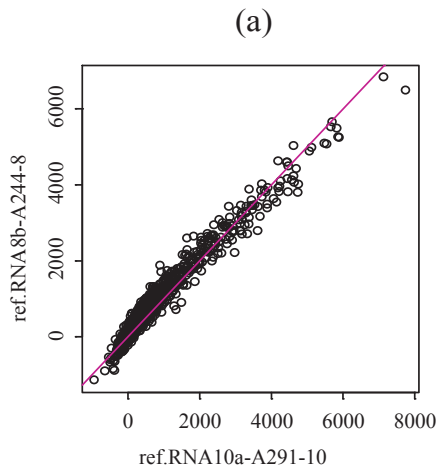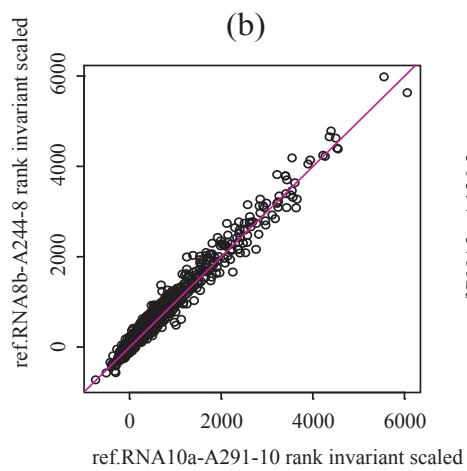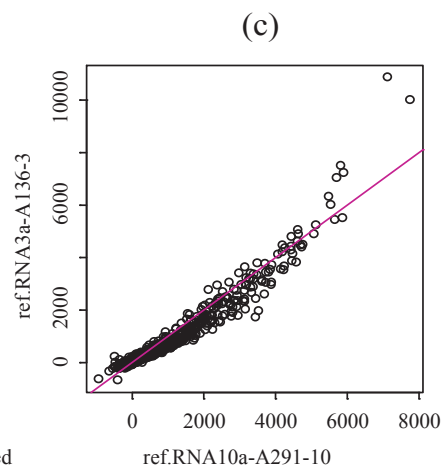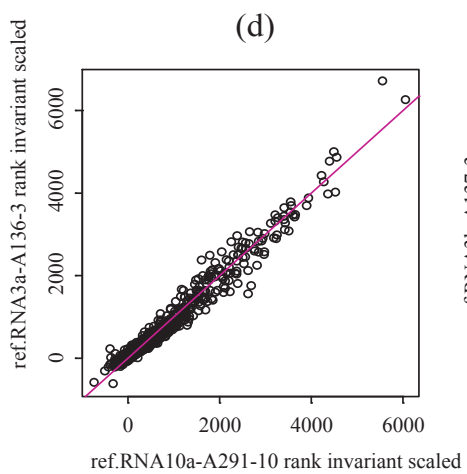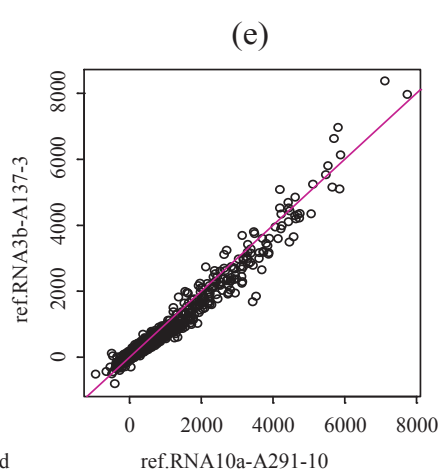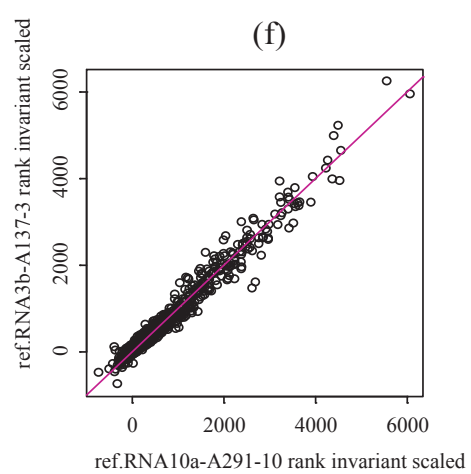

Supplement: pnas_191502998_14.pdf [file pnas_191502998_14.pdf]

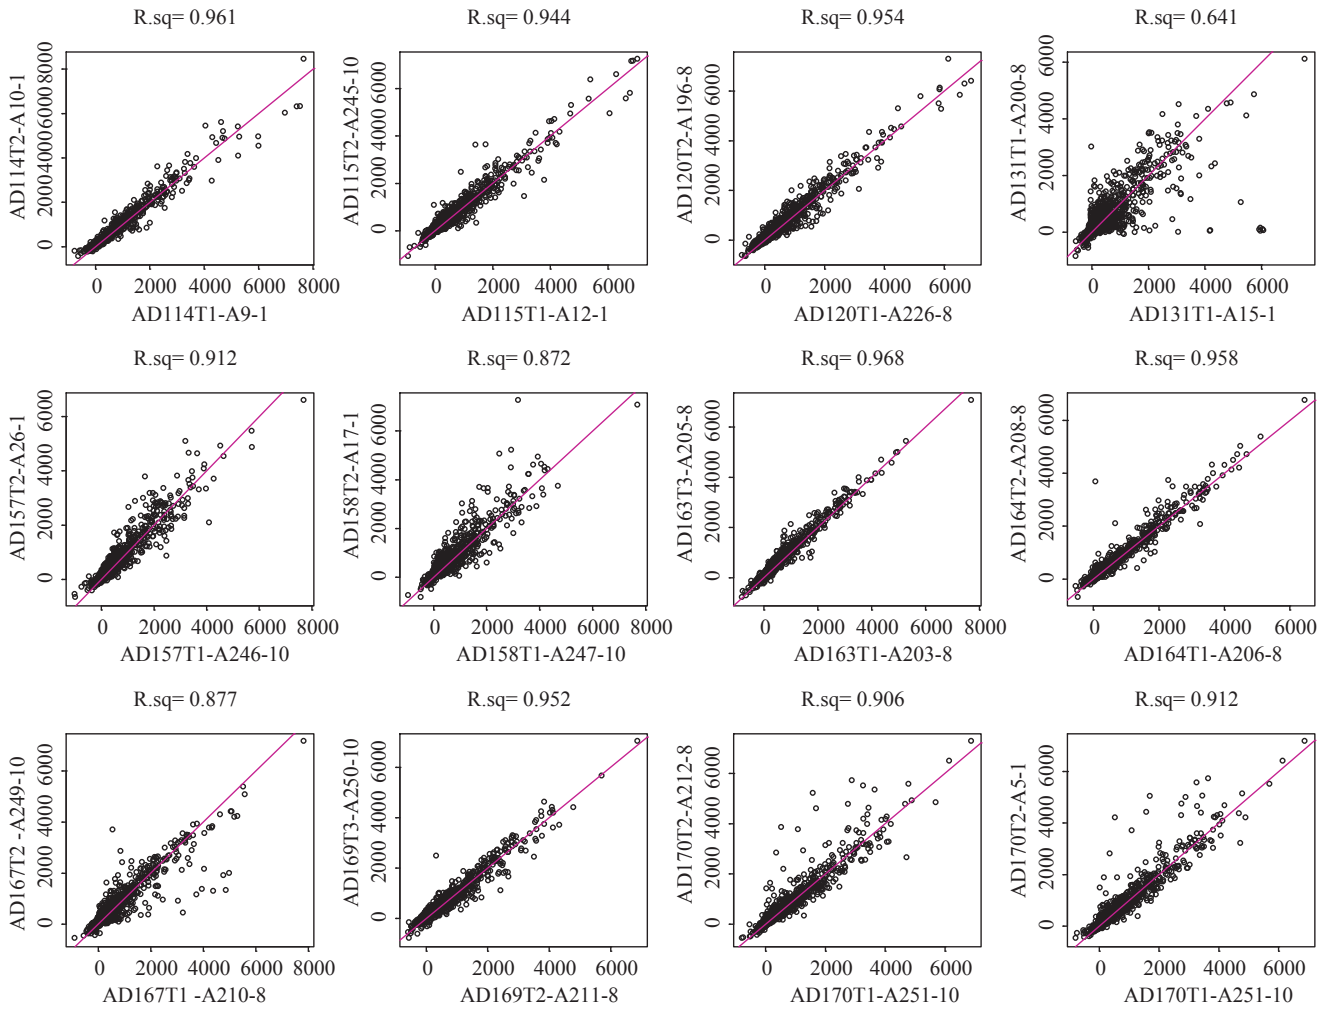

Supplement: pnas_191502998_15.pdf [file pnas_191502998_15.pdf]

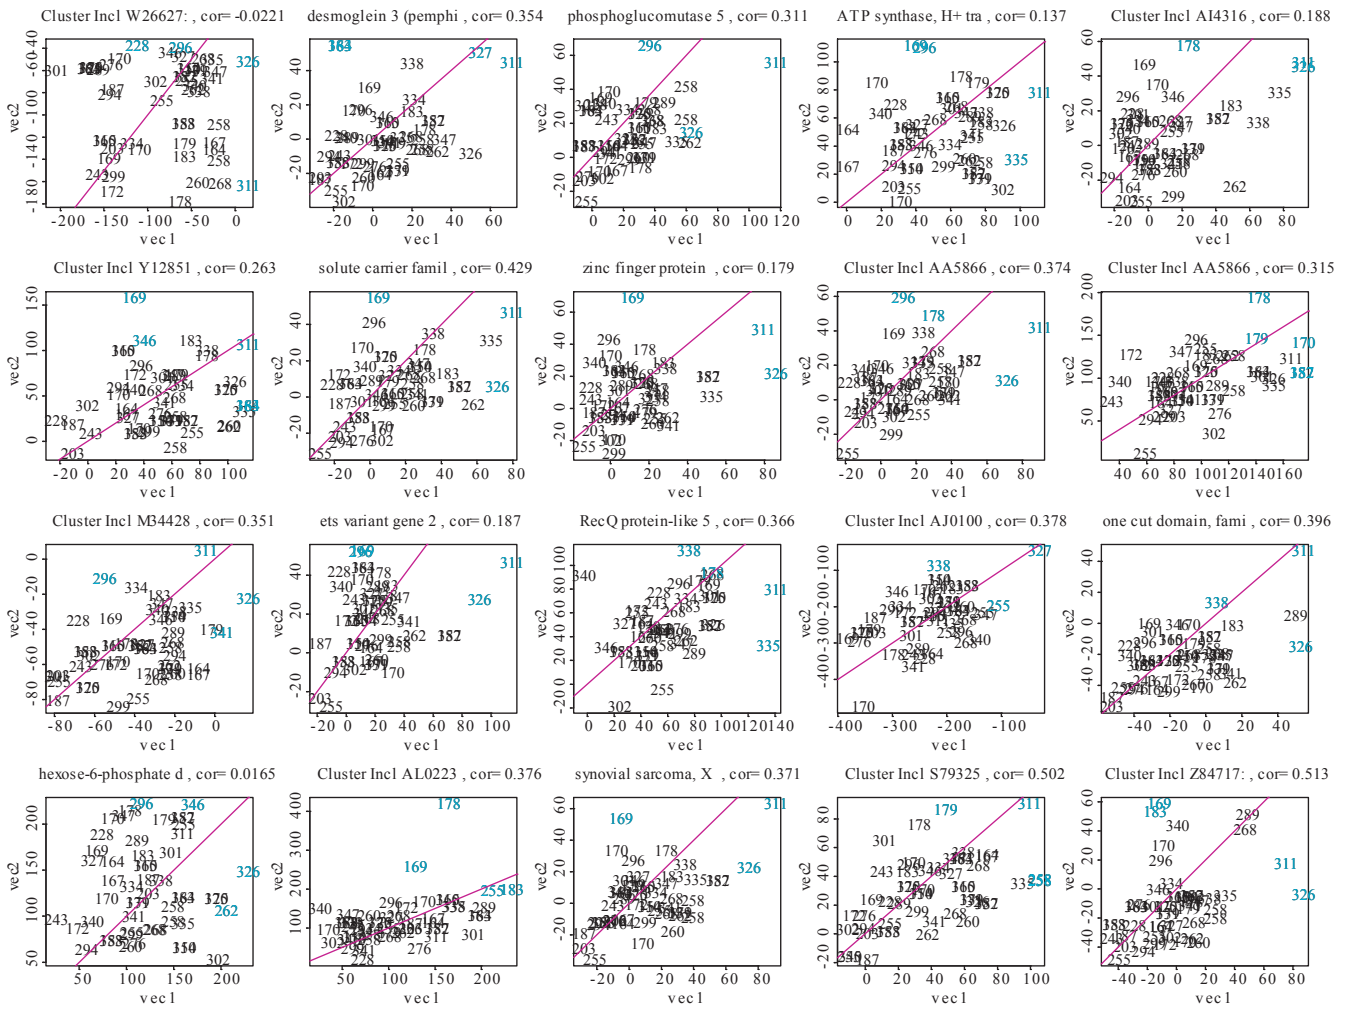

Supplement: pnas_191502998_16.pdf [file pnas_191502998_16.pdf]

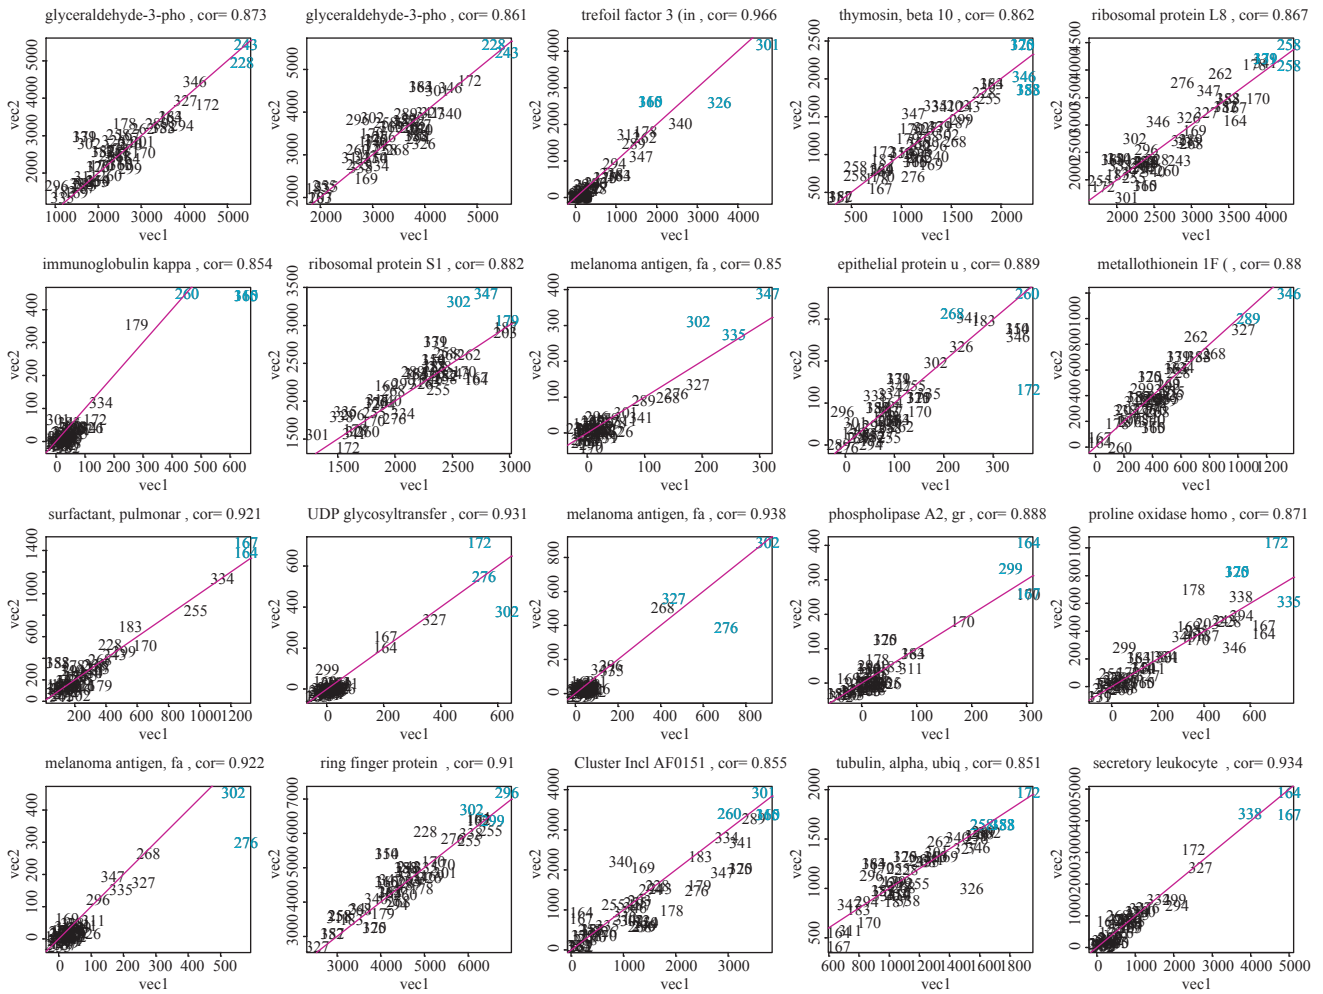

Supplement: pnas_191502998_17.pdf [file pnas_191502998_17.pdf]

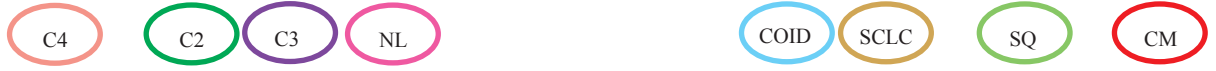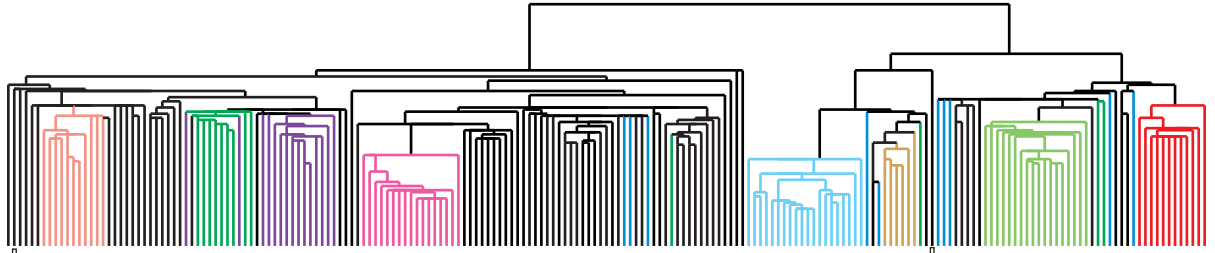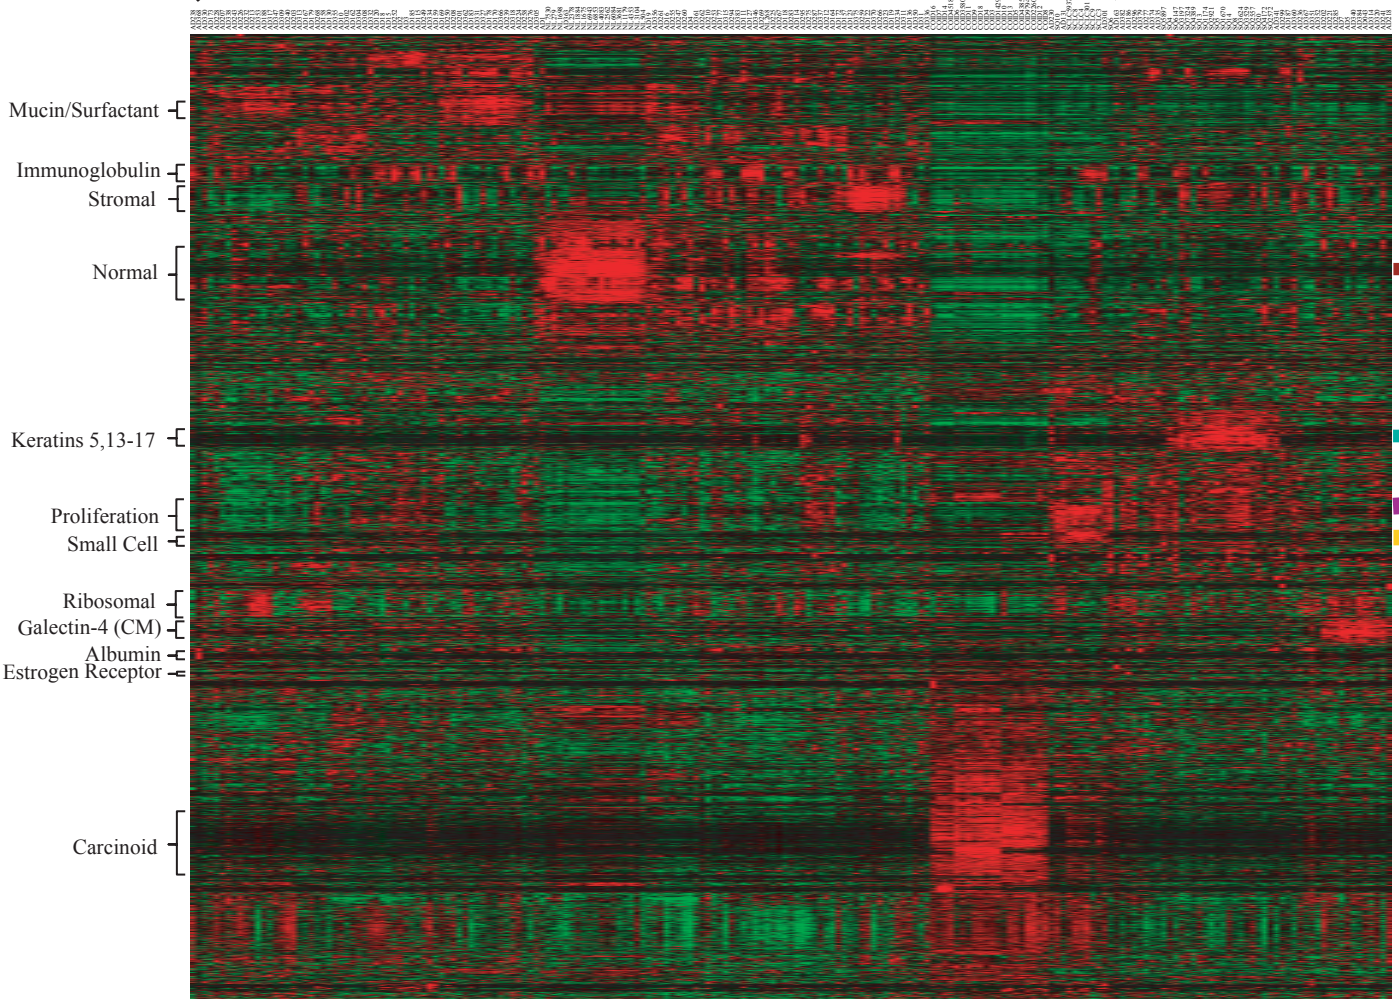

Supplement: pnas_191502998_18.pdf [file pnas_191502998_18.pdf]

675 genes

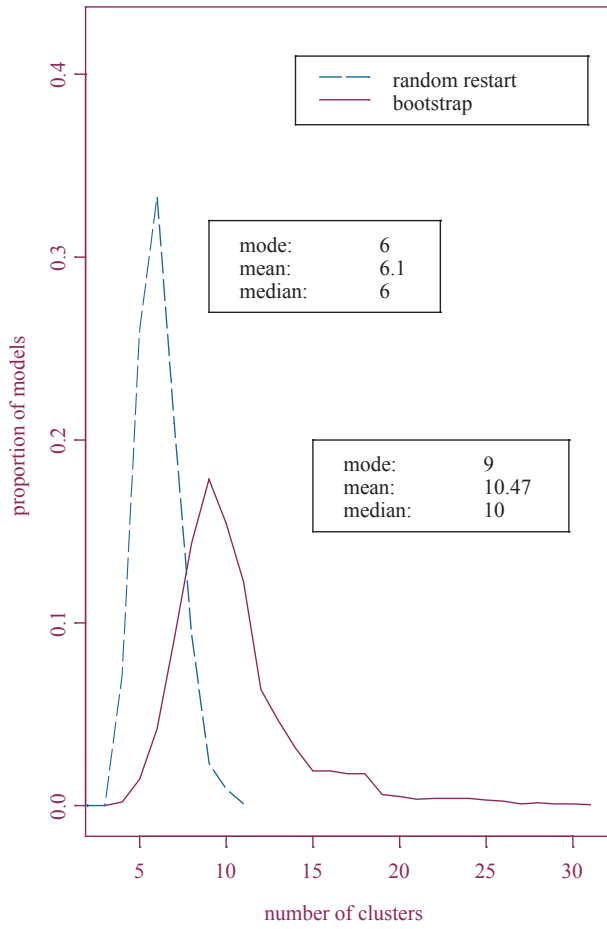

1514 genes

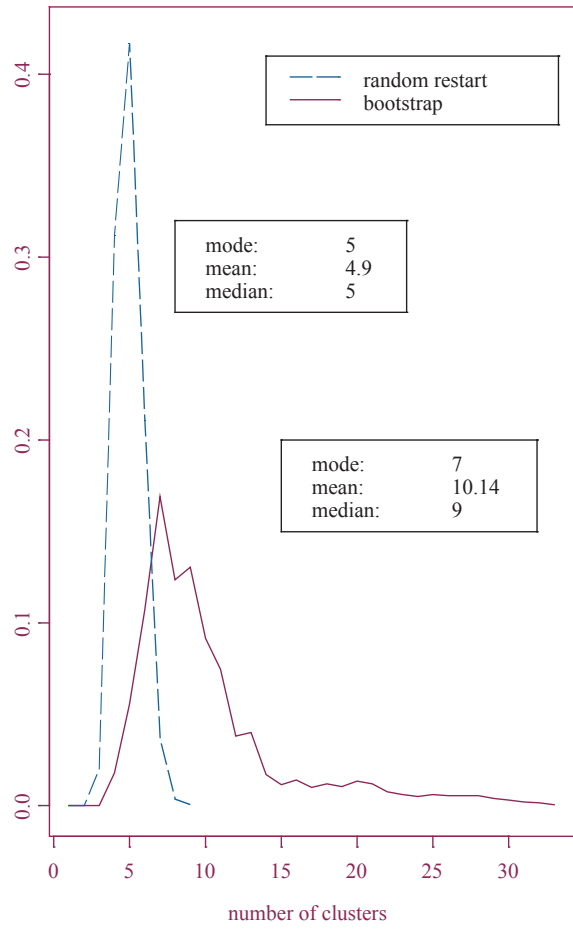

Supplement: pnas_191502998_19.pdf [file pnas_191502998_19.pdf]

CM

C1

C2

C3

NL

C4

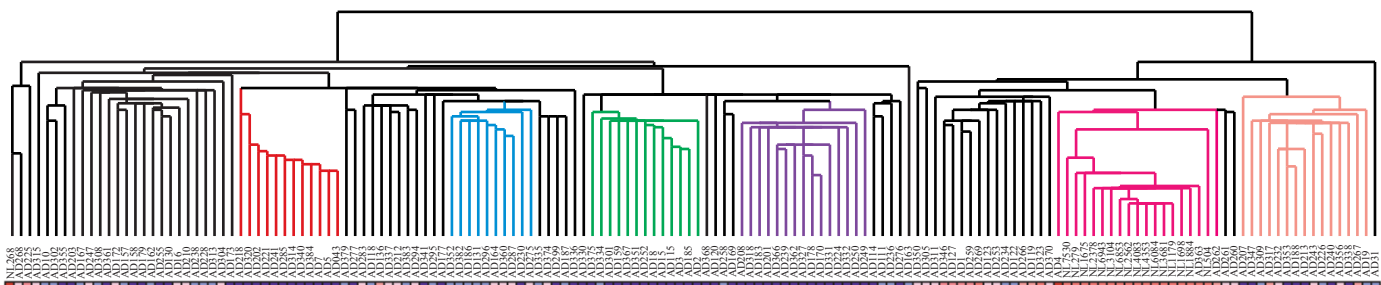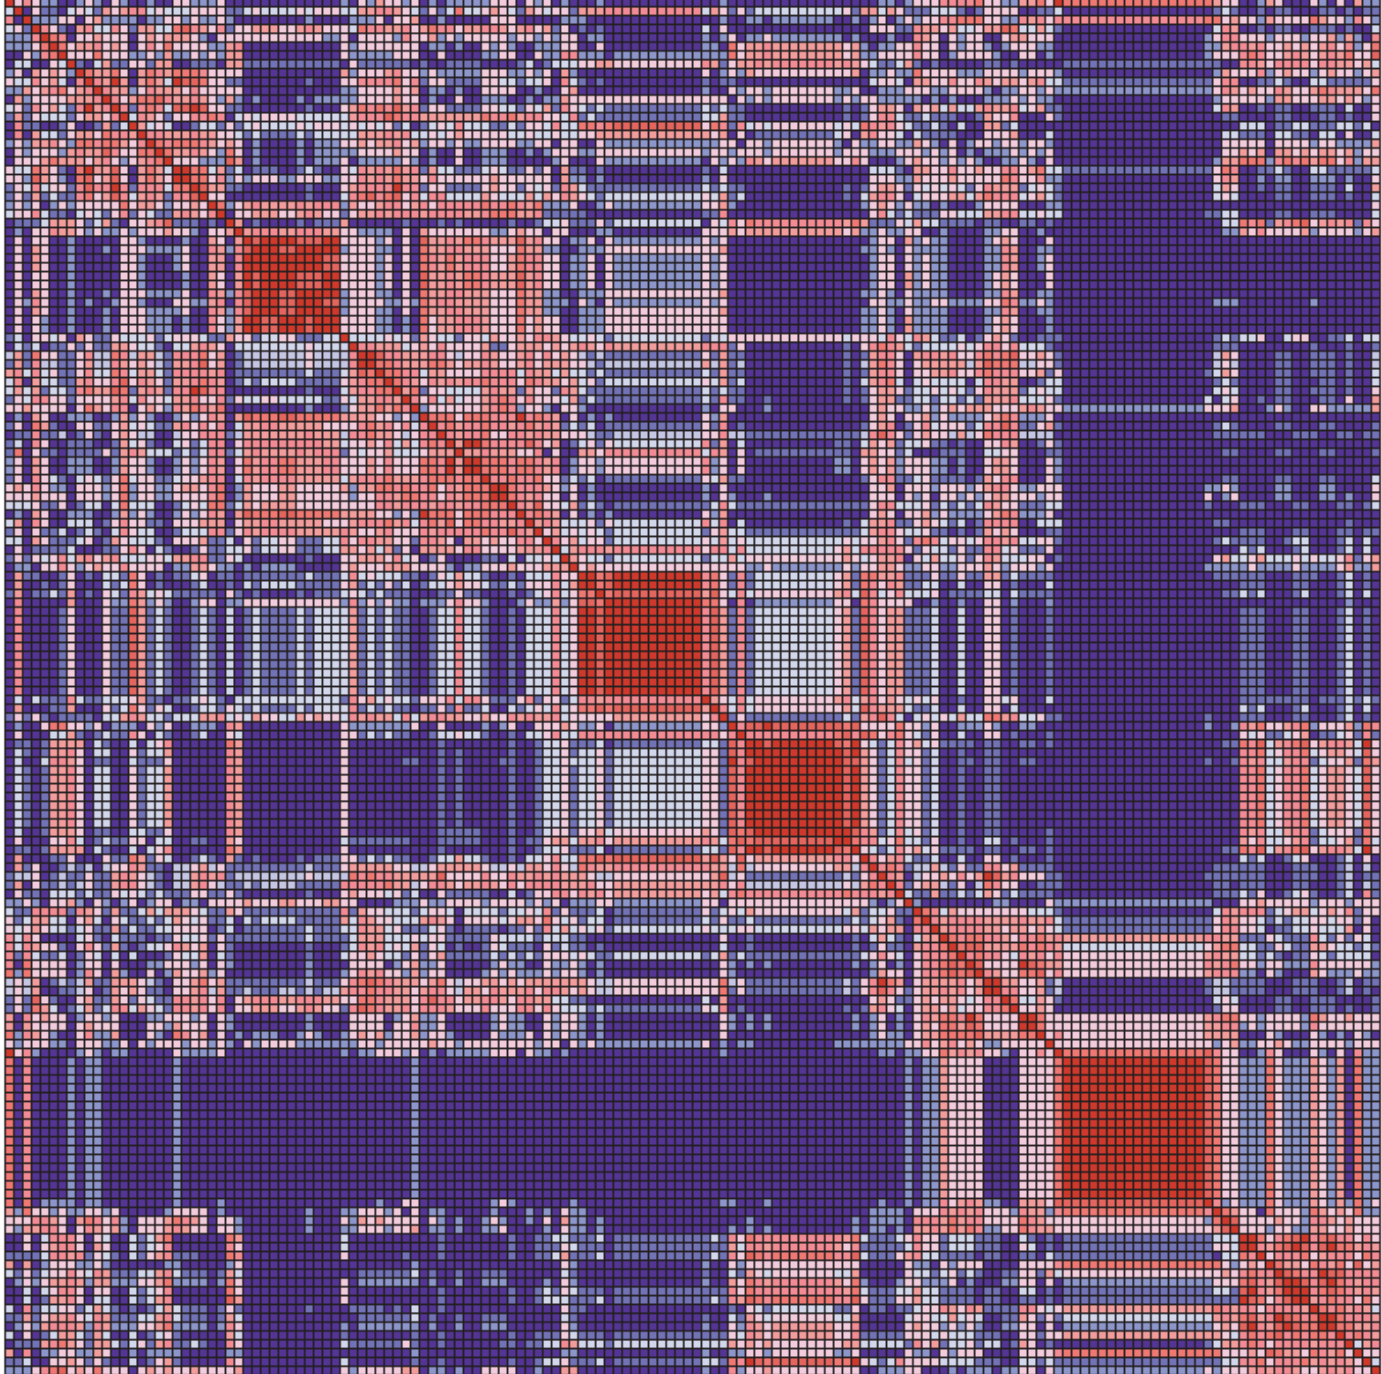

Supplement: pnas_191502998_20.pdf [file pnas_191502998_20.pdf]

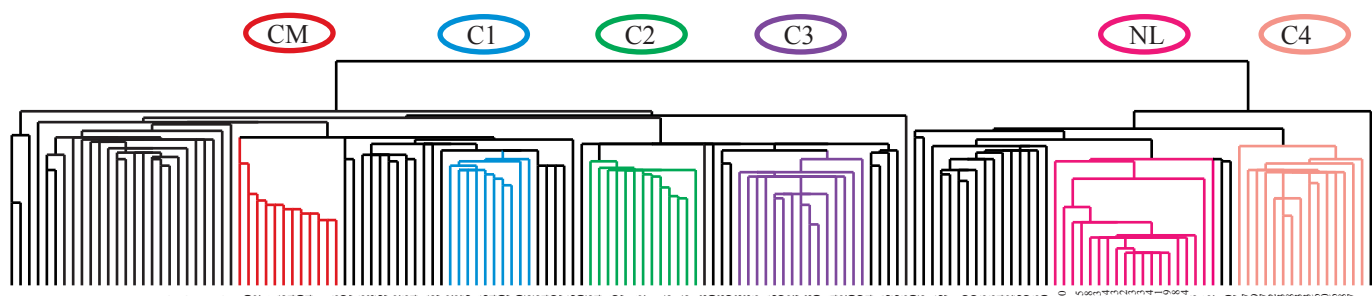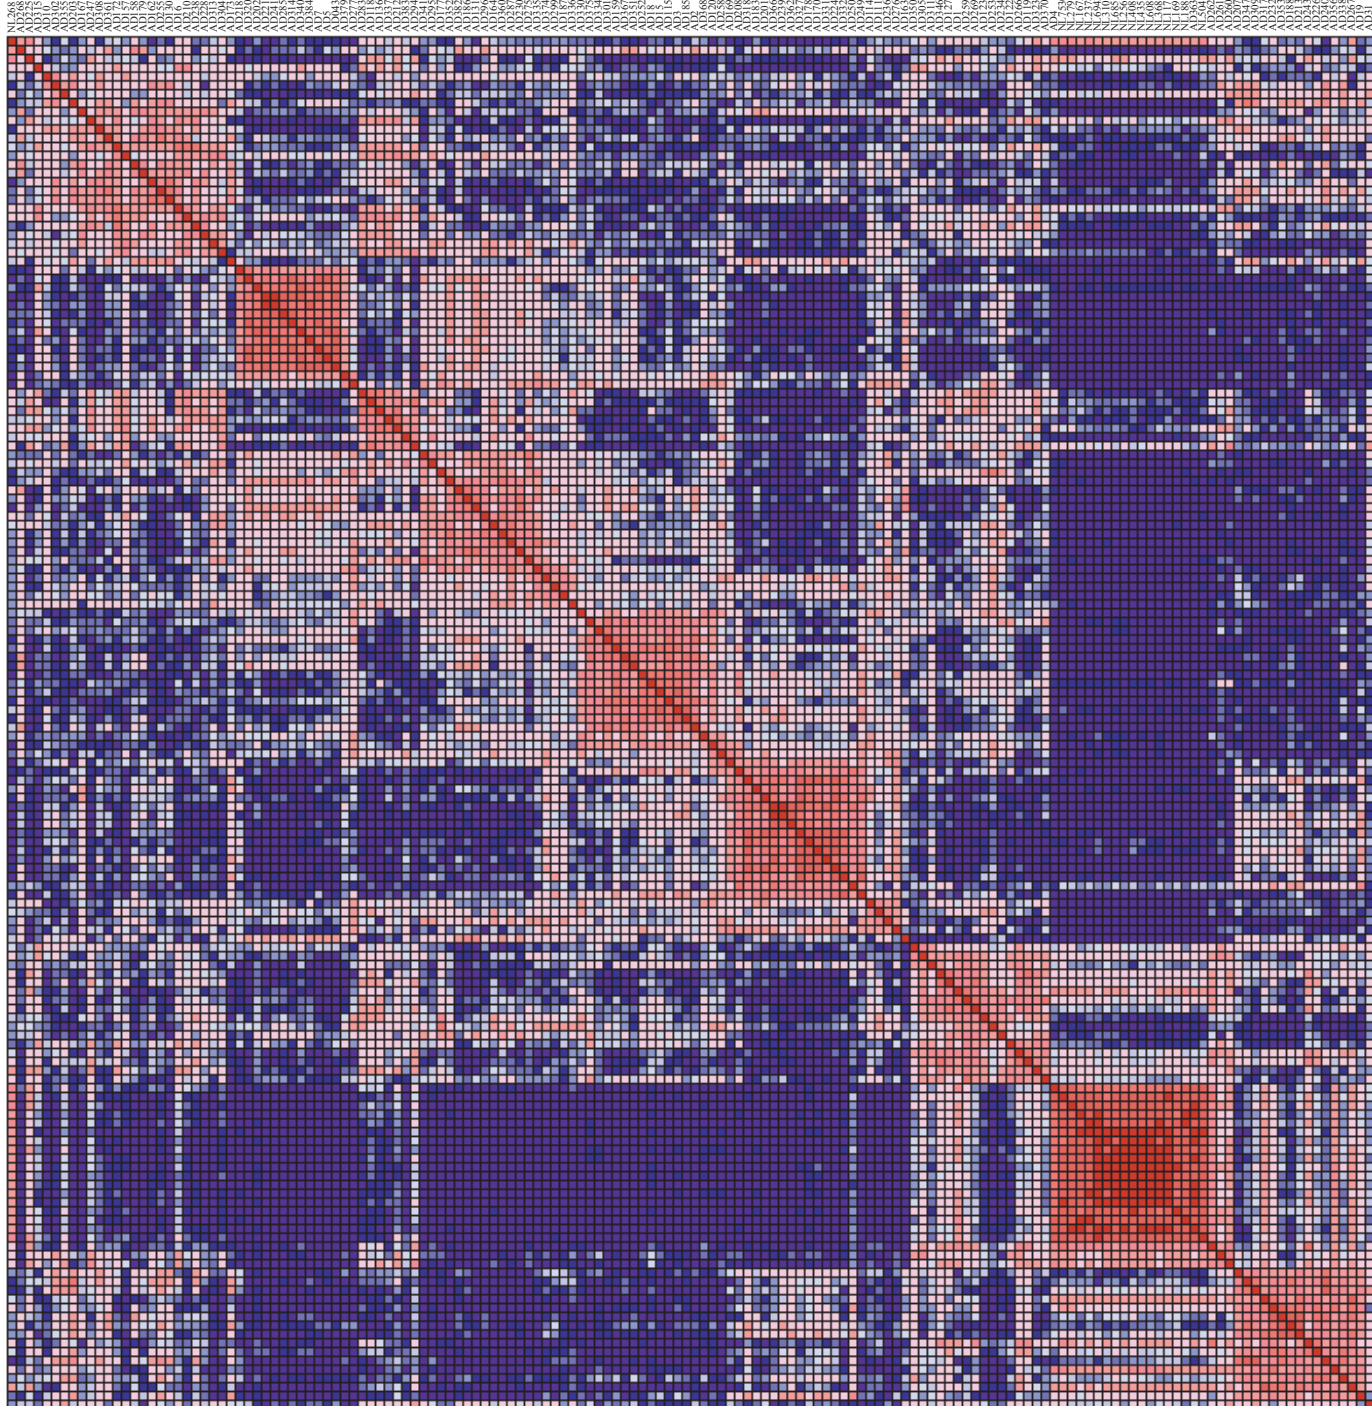

Supplement: pnas_191502998_21.pdf [file pnas_191502998_21.pdf]
